# Supplementary material for: Preparation of PSF/FEP mixed matrix membrane with super hydrophobic surface for efficient water-in-oil emulsion separation
Source: Royal Society of Chemistry journal article supplement (doi:10.1039/c8ra00055g), 2018-01-01
Supplement: c8ra00055g1.pdf [file c8ra00055g1.pdf]

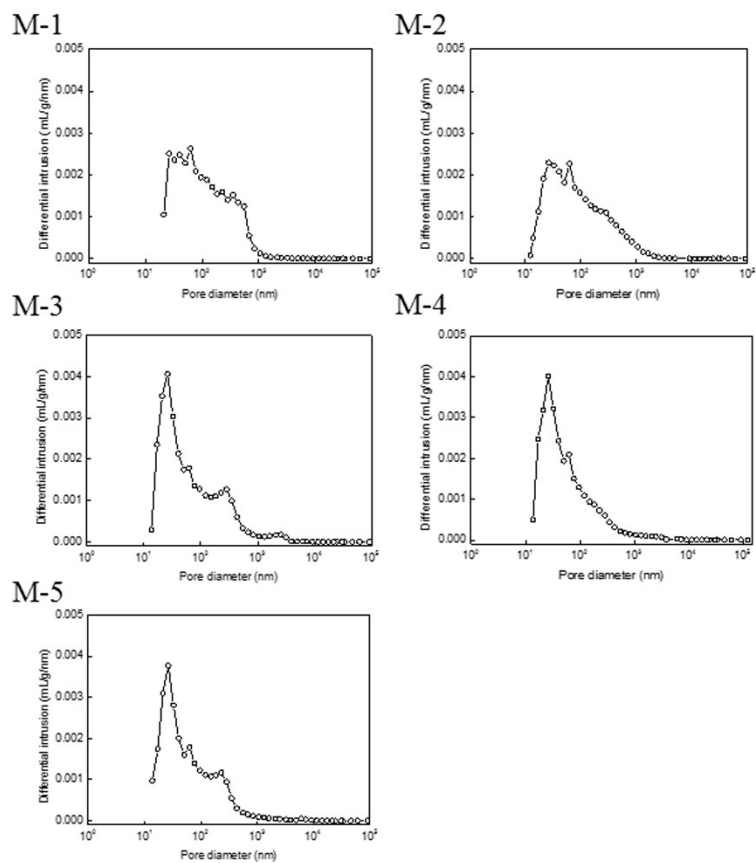

Fig. S1 The pore size distribution of the membranes.
